# Supplementary material for: Verticillium dahliae LysM effectors differentially contribute to virulence on plant hosts
Source: PubMed Central journal article supplement (PMC6638240; doi:10.1111/mpp.12520), 2017-02-14

# Vd2LysM

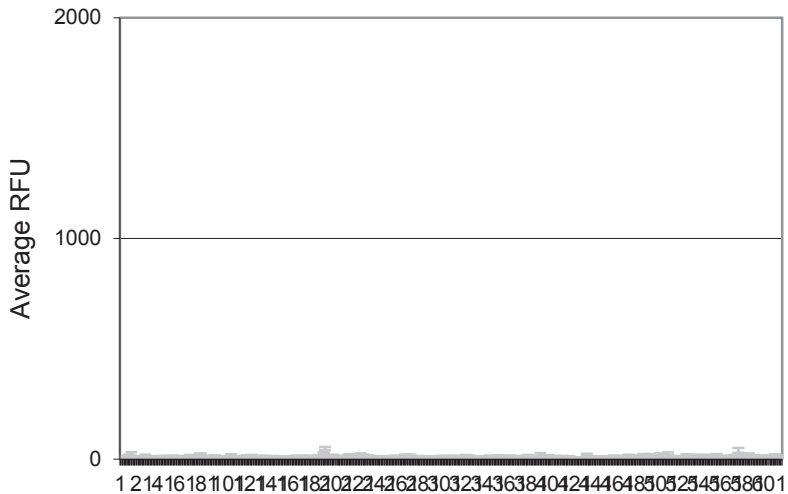

# Ecp6

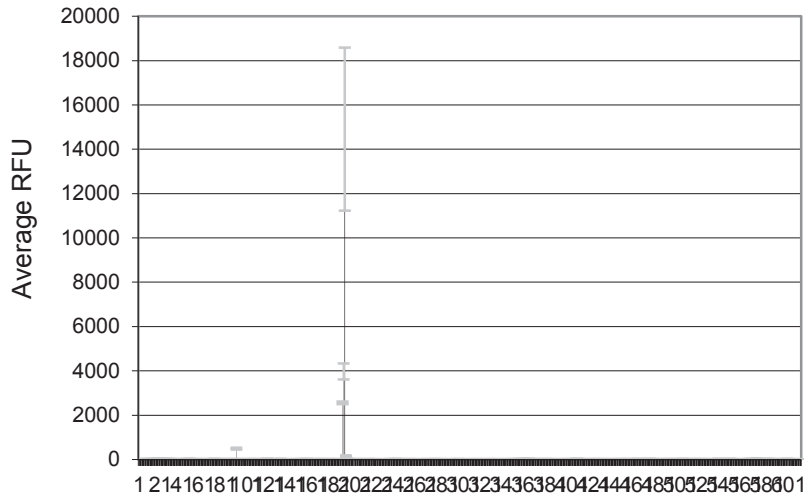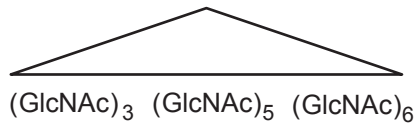

Supplement: MPP-18-596-s003.pdf [file MPP-18-596-s003.pdf]
